# Supplementary material for: Effects of time-of-day on the noradrenaline, adrenaline, cortisol and blood lipidome response to an ice bath
Source: Springer Nature journal article supplement (doi:10.1038/s41598-025-85304-8), 2025-01-08
Supplement: MOESM1 [file 41598_2025_85304_MOESM1_ESM.pdf › 41598_2025_85304_MOESM1_ESM.pdf]

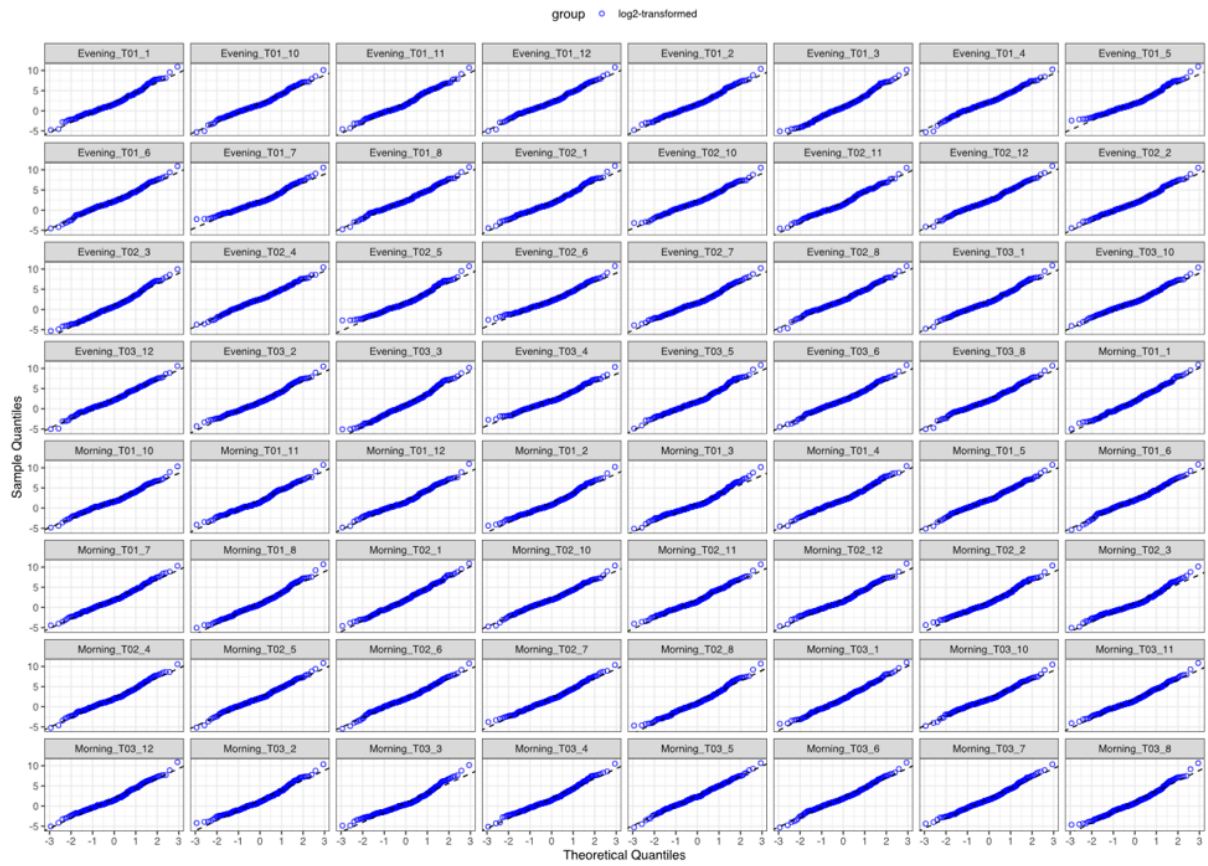

**Supplementary material 1 QQ-plots of log2-transformed lipid concentrations.** Normal distribution of 11 participants' plasma samples was validated from before (T01), 5 min after (T02) and 30 min after (T03) morning and evening ice baths.
