# Supplementary material for: Effects of time-of-day on the noradrenaline, adrenaline, cortisol and blood lipidome response to an ice bath
Source: Springer Nature journal article supplement (doi:10.1038/s41598-025-85304-8), 2025-01-08
Supplement: MOESM2 [file 41598_2025_85304_MOESM2_ESM.pdf › 41598_2025_85304_MOESM2_ESM.pdf]

|                               | <b>Women</b> | <b>Men</b> |
|-------------------------------|--------------|------------|
| <b>Age (years)</b>            | 25 ±6        | 27 ±6      |
| <b>BMI (kg/m<sup>2</sup>)</b> | 22 ±2        | 24 ±1      |
| <b>Weight (kg)</b>            | 65 ±5        | 78 ±8      |
| <b>Height (cm)</b>            | 170 ±3       | 182 ±6     |

**Supplementary material 2 Participant characteristics of women and men.** Age, BMI, body weight and height comparison of women (n = 6) and men (n = 6).
